# Supplementary material for: “We have either obsolete knowledge, obsolete equipment or obsolete skills”: policy-makers and clinical managers’ views on maternal health delivery in rural Nigeria
Source: HighWire-hosted journal article supplement (doi:10.1136/fmch-2021-000994), 2021-08-01
Supplement: fmch-2021-000994supp002_data_supplement.pdf [file fmch-2021-000994supp002_data_supplement.pdf]

## Key Informant Interview Guide

**Respondents:** A senior official with the State Ministry of Health, a senior official with the State Primary Healthcare Development Agency (SPHCDA), senior officials responsible for PHC at the LGAs, senior LGA officials, and clinical managers in PHC centres.

Thank you very much sir/ma, for your permission to have this interview on record to enable us to transcribe appropriately for our report. Our project is on increasing women's access to skilled pregnancy care to reduce maternal and perinatal mortality in rural Nigeria specifically.

| Topic                                                  | Questions and probes                                                                                                                                                                                                                                                                                                                    |
|--------------------------------------------------------|-----------------------------------------------------------------------------------------------------------------------------------------------------------------------------------------------------------------------------------------------------------------------------------------------------------------------------------------|
| Opening/ Overview of maternal health seeking behaviour | <p>First, we want to review the state of maternal health in rural parts of Edo State.</p> <p>Where do pregnant women in rural parts of Edo state seek antenatal, childbirth and postnatal care services?</p> <p>Probe: Why do you think women chose these services?</p>                                                                 |
| Overview of maternal care services                     | <p>Do you have information on the number of women who die during pregnancy as well as children from various medical complications?</p> <p>How does Edo State fare compared to the rest of the country?</p>                                                                                                                              |
| Quality of care                                        | <p>Are you satisfied with the quality of care provided in primary health care centres to pregnant women and children in the most remote part of Edo state?</p> <p>Please explain your response.</p>                                                                                                                                     |
| Service delivery of primary health care                | <p>What are the major issues surrounding the delivery of effective primary health care in Edo state?</p> <p>How do you think these issues can be resolved?</p> <p>Do you know of any existing laws, or policies and programmes run by the state or local government to promote effective primary health care delivery in the state?</p> |
| Financing primary health care                          | <p>How are primary health care centres currently financed in the state?</p>                                                                                                                                                                                                                                                             |

## Key Informant Interview Guide

|                            |                                                                                                                                                                                                                                        |
|----------------------------|----------------------------------------------------------------------------------------------------------------------------------------------------------------------------------------------------------------------------------------|
|                            | What is the average cost of maternal and childbirth services per delivery in rural PHCs?                                                                                                                                               |
| Infrastructural facilities | Can you comment on the state of infrastructural facilities for rural primary health care centres in Edo state?<br><br>How do you think the problem can be corrected? (if applicable)                                                   |
| Human resources            | Regarding human resources available in rural primary health care centers, do you think they have sufficient health workers?<br><br>Please explain your response.<br><br>How do you think the problem can be corrected? (if applicable) |
| Closing                    | Are there any other issues you wish to raise about the readiness of PHCs to deliver maternal and childcare services that we have not mentioned so far?<br><br>Thank you very much for your time                                        |
